# Supplementary material for: Highly photoluminescent and stable silicon nanocrystals functionalized via microwave-assisted hydrosilylation
Source: Royal Society of Chemistry journal article supplement (doi:10.1039/c7ra13577g), 2018-01-01
Supplement: c7ra13577g1.pdf [file c7ra13577g1.pdf]

## Supporting information:- Highly Photoluminescent and Stable Silicon Nanocrystals Functionalized via Microwave-Assisted Hydrosilylation

Deski Beri<sup>a</sup>, Dmitry Busko<sup>a</sup>, Andrey Mazilkin<sup>b</sup>, Ian A. Howard<sup>a,c</sup>, Bryce S. Richards<sup>a,c</sup> and Andrey Turshatov<sup>a</sup>

- Institute of Microstructure Technology, Karlsruhe Institute of Technology, Hermann-von-Helmholtz-Platz 1, 76344, Eggenstein-Leopoldshafen, Germany.
- Institute of Nanotechnology, Karlsruhe Institute of Technology, Hermann-von-Helmholtz-Platz 1, 76344 Eggenstein-Leopoldshafen, Germany.
- Light Technology Institute, Karlsruhe Institute of Technology, Engesserstrasse 13, 76131 Karlsruhe, Germany.

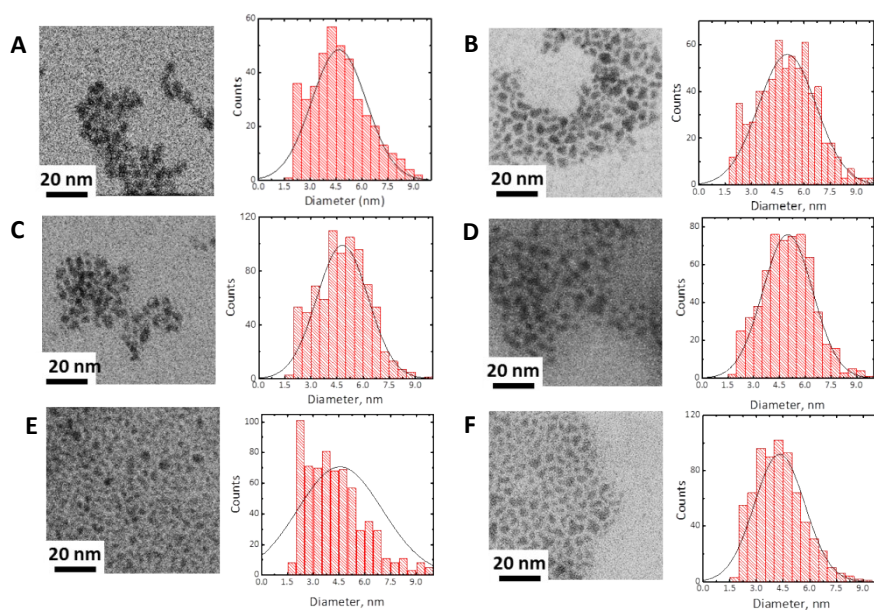

**Fig. S1** TEM images and particle distribution of of free standing Si-NCs capped with hexene-1 (A), octane-1 (B), decene-1 (C), dodecene-1 (D), teteradecene-1 (E) and hexadecene-1 (F).

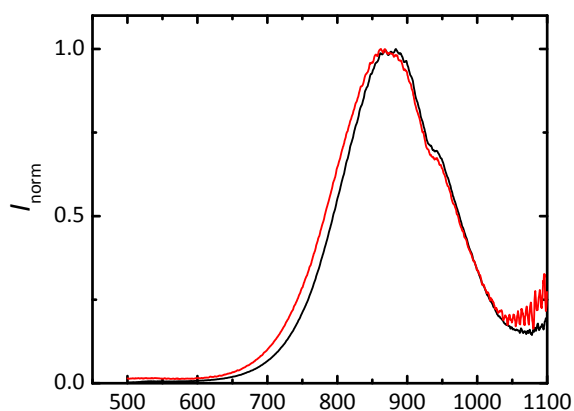

**Fig. S2** Normalized luminescence spectrums of Si-NCs prepared through MW heating (20 min, 250 °C) – black line and conventional heating (18 hours, 175 °C) – red line. Capping ligand is decene-1. PLQY in case of MW heating is 27 %. PLQY after conventional heating is ..%

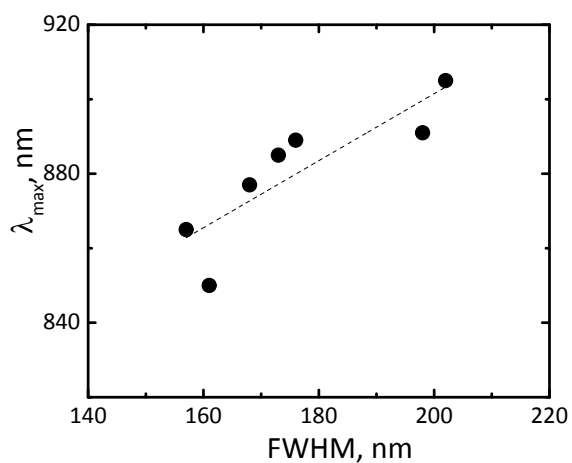

**Fig. S3.** Position of luminescence maximum as function of the full width at half maximum (FWHM) derived for the Si-NCs luminescence peaks (Fig. 2). Fig. S3 displays red shift in the position of luminescence maximum observed for Si-NCs with broad size distribution (e.g. broad luminescence peak)

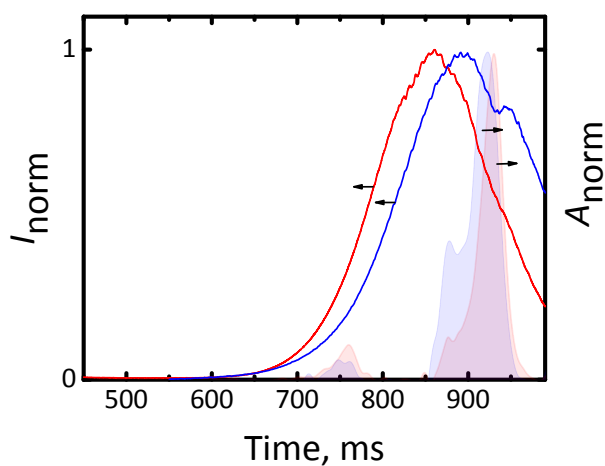

**Fig. S4.** Emission ( $I_{\text{norm}}$ ) of Si-NCs capped with hexene-1 (red) and hexadecene-1 (blue) dispersed in hexene-1 and hexadecene-1, correspondingly. NIR absorption ( $A_{\text{norm}}$ ) of hexene-1 (red) and hexadecene-1 (blue).

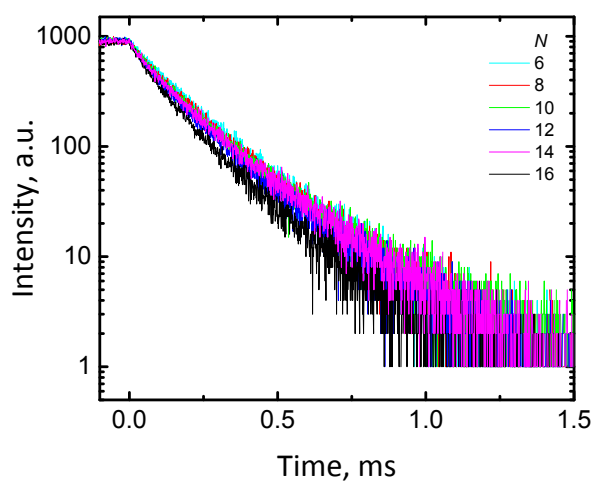

**Fig. S5** Luminescence decays of Si-NCs with different capping ligands.  $N$  is the number of carbon atoms in the linear aliphatic chain of the ligand.
